# Supplementary material for: Outcomes after observation stays among older adult Medicare beneficiaries in the USA: retrospective cohort study
Source: PubMed Central journal article supplement — BMJ. 2017 Jun 20;357:j2616. doi: 10.1136/bmj.j2616 (PMC5476173; doi:10.1136/bmj.j2616), 2017-06-20
Supplement: dhak037736.ww.pdf [file dhak037736.ww.pdf]

## **WEB APPENDIX: SUPPLEMENTARY CONTENT**

Kumar Dharmarajan, Li Qin, Maggie Bierlein, Jennie E S Choi, Zhenqiu Lin, Nihar R Desai, Erica S Spatz, Harlan M Krumholz, Arjun K Venkatesh

**Web Appendix Table 1.** 25 Most Common Conditions Treated During Index Observation Stays, Emergency Department Stays, and Inpatient Stays, 2006-2011

**Web Appendix Figure 1.** Flow Diagram Describing Cohort Exclusions. Data for index observation stay cohort is presented in Web Appendix Figure 1A. Data for index emergency department treatment-and-discharge cohort is presented in Web Appendix Figure 1B. Data for index inpatient stay cohort is presented in Web Appendix Figure 1C.

**Web Appendix Table 1. 25 Most Common Conditions Treated During Index Observation Stays, Emergency Department Stays, and Inpatient Stays, 2006-2011**

| <b>Rank</b> | <b>Study Cohort<br/>Index Observation Stays<br/>(N=363,037)</b>        | <b>Index Emergency Department<br/>Treatment-and-Discharge Stays<br/>(N=2,540,000)</b> | <b>Index Inpatient Stays<br/>(N=2,667,525)</b>                                        |
|-------------|------------------------------------------------------------------------|---------------------------------------------------------------------------------------|---------------------------------------------------------------------------------------|
| <b>1</b>    | Nonspecific chest pain (19.3%)                                         | Superficial injury; contusion (6.6%)                                                  | Congestive heart failure; nonhypertensive (5.4%)                                      |
| <b>2</b>    | Syncope (5.2%)                                                         | Nonspecific chest pain (5.6%)                                                         | Pneumonia (except that caused by tuberculosis or sexually transmitted disease) (5.1%) |
| <b>3</b>    | Cardiac dysrhythmias (4.2%)                                            | Urinary tract infections (3.7%)                                                       | Osteoarthritis (4.6%)                                                                 |
| <b>4</b>    | Coronary atherosclerosis and other heart disease (4.2%)                | Abdominal pain (3.3%)                                                                 | Cardiac dysrhythmias (4.1%)                                                           |
| <b>5</b>    | Fluid and electrolyte disorders (3.4%)                                 | Sprains and strains (3.1%)                                                            | Septicemia (except in labor) (3.6%)                                                   |
| <b>6</b>    | Conditions associated with dizziness or vertigo (2.3%)                 | Spondylosis; intervertebral disc disorders; other back problems (2.9%)                | Coronary atherosclerosis and other heart disease (3.4%)                               |
| <b>7</b>    | Abdominal pain (2.0%)                                                  | Open wounds of extremities (2.8%)                                                     | Chronic obstructive pulmonary disease and bronchiectasis (3.4%)                       |
| <b>8</b>    | Deficiency and other anemia (1.9%)                                     | Conditions associated with dizziness or vertigo (2.6%)                                | Urinary tract infections (3.0%)                                                       |
| <b>9</b>    | Transient cerebral ischemia (1.9%)                                     | Other lower respiratory disease (2.6%)                                                | Acute cerebrovascular disease (2.9%)                                                  |
| <b>10</b>   | Congestive heart failure; nonhypertensive (1.8%)                       | Other injuries and conditions due to external causes (2.5%)                           | Acute myocardial infarction (2.6%)                                                    |
| <b>11</b>   | Spondylosis; intervertebral disc disorders; other back problems (1.8%) | Open wounds of head; neck; and trunk (2.5%)                                           | Fracture of neck of femur (hip) (2.5%)                                                |
| <b>12</b>   | Residual codes; unclassified (1.7%)                                    | Chronic obstructive pulmonary disease and bronchiectasis (2.5%)                       | Fluid and electrolyte disorders (2.1%)                                                |
| <b>13</b>   | Other lower respiratory disease (1.7%)                                 | Other connective tissue disease (2.4%)                                                | Complication of device; implant or graft (2.1%)                                       |
| <b>14</b>   | Urinary tract infections (1.6%)                                        | Other non-traumatic joint disorders (2.2%)                                            | Acute and unspecified renal failure (1.9%)                                            |
| <b>15</b>   | Chronic obstructive pulmonary disease and bronchiectasis (1.5%)        | Syncope (2.2%)                                                                        | Spondylosis; intervertebral disc disorders; other back problems (1.9%)                |
| <b>16</b>   | Biliary tract disease (1.4%)                                           | Other gastrointestinal disorders (2.2%)                                               | Nonspecific chest pain (1.8%)                                                         |
| <b>17</b>   | Other gastrointestinal disorders (1.3%)                                | Fracture of upper limb (2.1%)                                                         | Gastrointestinal hemorrhage (1.6%)                                                    |
| <b>18</b>   | Other nervous system disorders (1.3%)                                  | Cardiac dysrhythmias (2.1%)                                                           | Skin and subcutaneous tissue infections (1.5%)                                        |
| <b>19</b>   | Other connective tissue disease (1.2%)                                 | Residual codes; unclassified (1.8%)                                                   | Respiratory failure; insufficiency; arrest (adult) (1.4%)                             |
| <b>20</b>   | Malaise and fatigue (1.2%)                                             | Essential hypertension (1.6%)                                                         | Intestinal obstruction without hernia (1.4%)                                          |
| <b>21</b>   | Gastrointestinal hemorrhage (1.2%)                                     | Fluid and electrolyte disorders (1.6%)                                                | Syncope (1.4%)                                                                        |
| <b>22</b>   | Complication of device; implant or graft                               | Genitourinary symptoms and ill-defined                                                | Diverticulosis and diverticulitis (1.3%)                                              |

|           |                                             |                                                |                                             |
|-----------|---------------------------------------------|------------------------------------------------|---------------------------------------------|
|           | (1.2%)                                      | conditions (1.5%)                              |                                             |
| <b>23</b> | Diabetes mellitus with complications (1.1%) | Skin and subcutaneous tissue infections (1.5%) | Biliary tract disease (1.2%)                |
| <b>24</b> | Other circulatory disease (1.0%)            | Malaise and fatigue (1.5%)                     | Other fractures (1.2%)                      |
| <b>25</b> | Abdominal hernia (1.0%)                     | Other upper respiratory disease (1.5%)         | Diabetes mellitus with complications (1.1%) |

---

**Web Appendix Figure 1A. Flow Diagram Describing Index Observation Stay Cohort Exclusions**

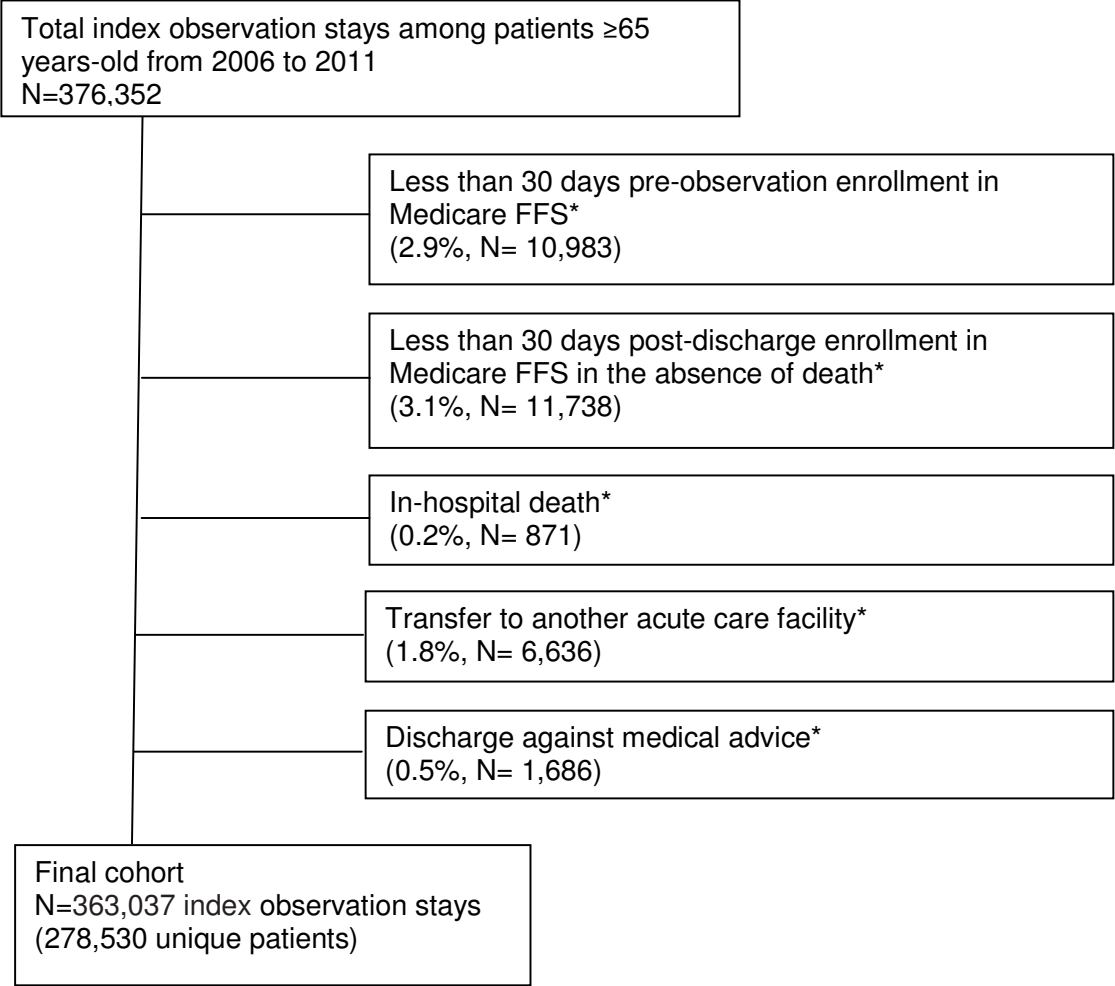

\*Categories are not mutually exclusive

**Web Appendix Figure 1B. Flow Diagram Describing Index Emergency Department Treatment-and-Discharge Stay Cohort Exclusions**

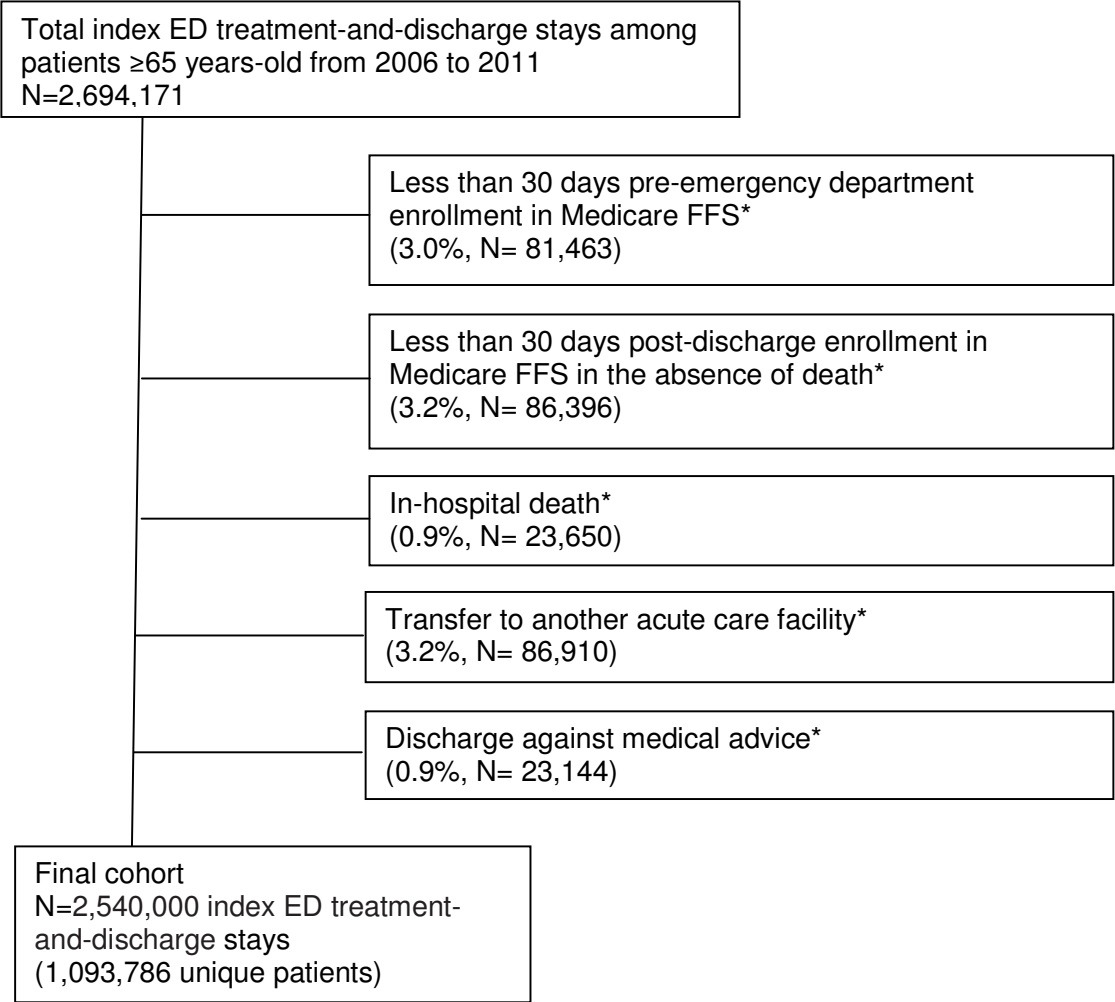

\*Categories are not mutually exclusive

**Web Appendix Figure 1C. Flow Diagram Describing Index Inpatient Stay Cohort Exclusions**

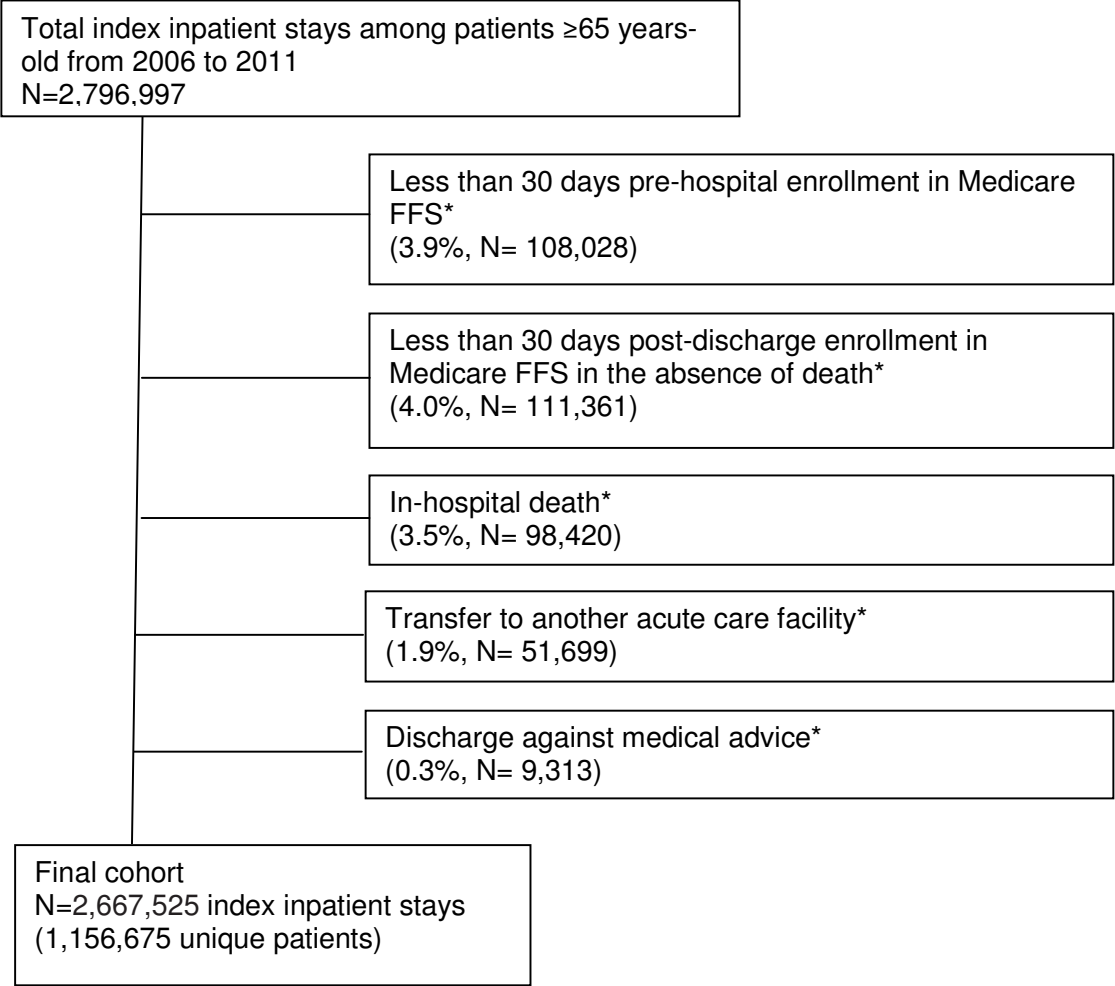

\*Categories are not mutually exclusive
